# Supplementary material for: PD-L1 aptamer isolation via Modular-SELEX and its applications in cancer cell detection and tumor tissue section imaging
Source: Royal Society of Chemistry journal article supplement (doi:10.1039/d1an00182e), 2021-01-01
Supplement: d1an00182e1.pdf [file d1an00182e1.pdf]

## Electronic Supporting Information

# **PD-L1 aptamer isolation via Modular-SELEX and its applications in cancer cell detection and tumor tissue section imaging**

Jiyuan Li, <sup>+</sup> Xijiao Ren, <sup>+</sup> Jiaying Zhao and Xinhui Lou \*

Department of Chemistry, Capital Normal University, Xisanhuan North Road 105,  
Beijing 100048, China

[+] These authors contributed equally to this work.

### **Corresponding Authors**

\* Email: [xinhuilou@cnu.edu.cn](mailto:xinhuilou@cnu.edu.cn)

Tel: +86-10-68902491 ext. 808.

Fax: +86-10-68902320.

## **A Table of Contents**

**Figure S1.** An overview of Modular-SELEX for PD-L1 aptamer isolation

**Table S1.** DNAs used in this study

**Table S2.** Experimental parameters used in Modular-SELEX for PD-L1 aptamer isolation

**Table S3.** Top 50 sequences identified by high-throughput sequencing of the final enriched library

**Table S4.** Sequences identified by cloning sequencing of the final enriched library

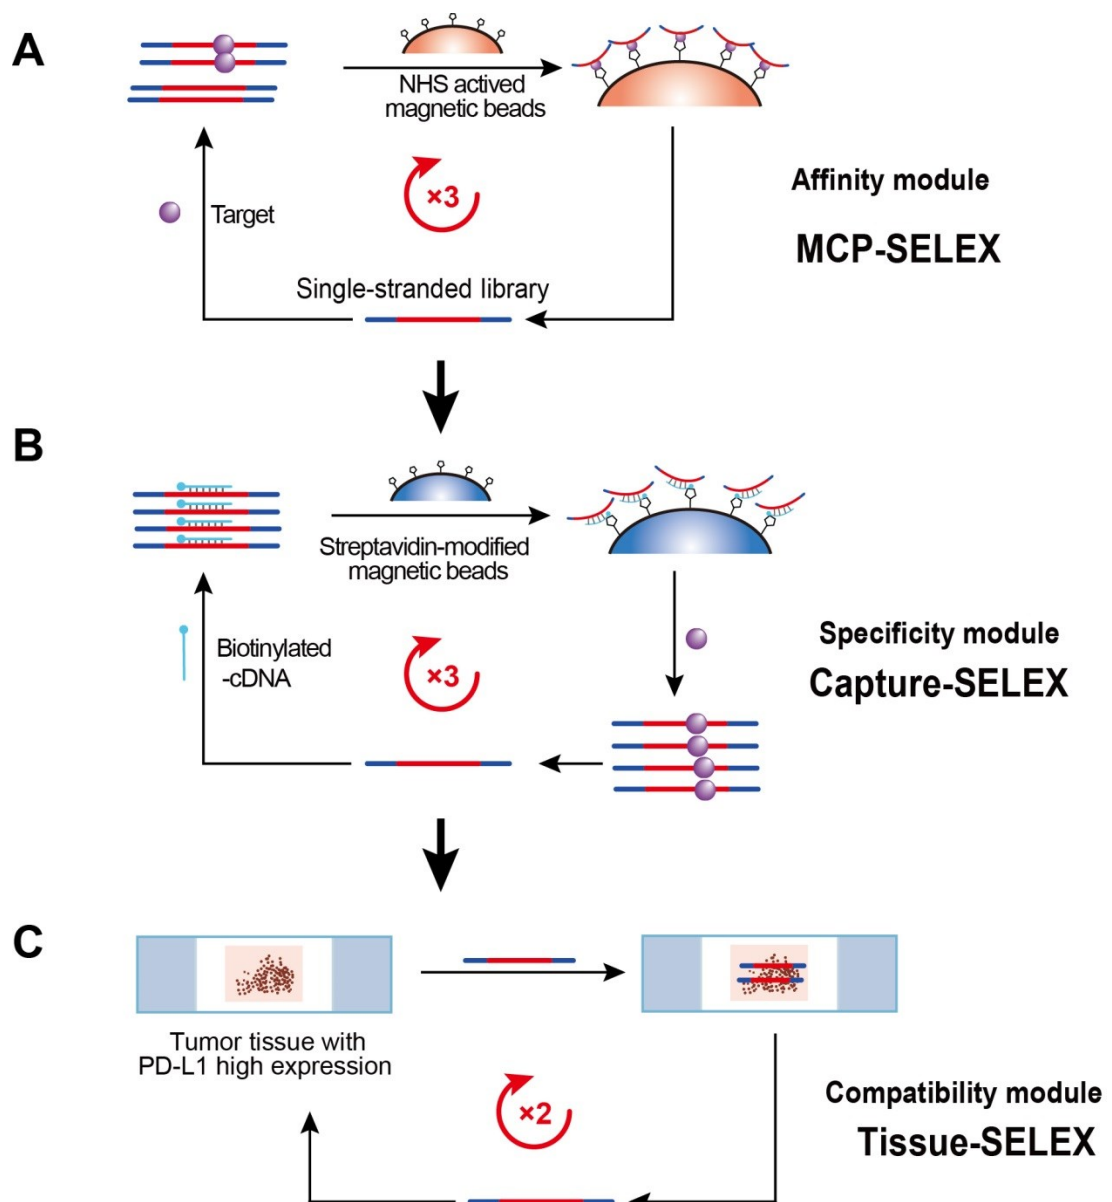

**Figure S1.** An overview of Modular-SELEX for PD-L1 aptamer isolation, including three sequential modules: (A) affinity module: three rounds of MCP-SELEX; (B) specificity module: three rounds of Capture-SELEX; and compatibility module: two rounds of Tissue-SELEX.

**Table S1.** DNAs used in this study

| <b>Name</b>       | <b>Sequences (5'- 3')</b>                                                                                               | <b>Description</b>                                                                                     |
|-------------------|-------------------------------------------------------------------------------------------------------------------------|--------------------------------------------------------------------------------------------------------|
| Pool <sub>0</sub> | <u>TCTCAGCTCTAGTGGTGACG</u> -N <sub>20</sub> -<br>ACGAGACGAGCTTATGCGTA-N <sub>20</sub> -<br><u>ACTCTGTCCTGAACCTGTTG</u> | Initial random library                                                                                 |
| FP                | TCTCAGCTCTAGTGGTGACG                                                                                                    | Forward primer                                                                                         |
| Biotin-RP         | Biotin-CAACAGG TTCAGGACAGAGT                                                                                            | Biotin labeled reverse primer                                                                          |
| RP                | CAACAGG TTCAGGACAGAGT                                                                                                   | Reverse primer used for high-throughput sequencing                                                     |
| Tagged-FP         | aaagca-TCTCAGCTCTAGTGGTGACG                                                                                             | Forward primer used for high-throughput sequencing                                                     |
| Biotin-cDNA       | Biotin-(CH <sub>2</sub> CH <sub>2</sub> O) <sub>18</sub> -GCATAAGCTCGT CTC                                              | Complementary strand used in Capture-SELEX                                                             |
| Clon-3            | CCCTCCTCCTAACTGTTCTT <u>ACGAAACGAG</u><br><u>CTTATGCGTAATGATGACTGTCGTAGTTTCG</u>                                        | Clon-3 used in Nano-Affi assay and EMSA assay                                                          |
| Cy5-Clon-3        | Cy5-<br>CCCTCCTCCTAACTGTTCTT <u>ACGAAACGAG</u><br><u>CTTATGCGTAATGATGACTGTCGTAGTTTCG</u>                                | Cy5 labeled Clon-3 used for flow cytometry analysis                                                    |
| Cy5-N-60          | Cy5-<br>AAAAAAAAAAAAAAAAAAAAAAAAAAAA<br>AAAAAAAAAAAAAAAAAAAAAAAAAAAA<br>AAAA                                            | Cy5 labeled N-60 used for flow cytometry analysis as negative control                                  |
| Cy5.5-Clon-3      | Cy5-<br>CCCTCCTCCTAACTGTTCTT <u>ACGAAACGAG</u><br><u>CTTATGCGTAATGATGACTGTCGTAGTTTCG</u>                                | Cy5.5 labeled Clon-3 used for tissue sections imaging and K <sub>D</sub> determination using waveguide |
| Cy5.5-N-60        | Cy5-<br>AAAAAAAAAAAAAAAAAAAAAAAAAAAA<br>AAAAAAAAAAAAAAAAAAAAAAAAAAAA<br>AAAA                                            | Cy5.5 labeled N-60 used for tissue sections imaging as negative control                                |

**Table S2.** Experimental parameters used in Modular-SELEX for PD-L1 aptamer isolation

| Round | SELEX Method | Library (pmol) | PD-L1(pmol)                 | Assay ( $\mu$ L) | Temperature | Negative-SELEX              | Binding (%)                 |
|-------|--------------|----------------|-----------------------------|------------------|-------------|-----------------------------|-----------------------------|
| 1     | MCP          | 1000           | 50                          | 500              | Room        | Magnetic beads <sup>b</sup> | 1.2 $\pm$ 0.7 <sup>c</sup>  |
| 2     | MCP          | 100            | 50                          | 500              | Room        | Magnetic beads <sup>b</sup> | 3.6 $\pm$ 0.4 <sup>c</sup>  |
| 3     | MCP          | 100            | 25                          | 500              | 37 °C       | Magnetic beads <sup>b</sup> | 3.3 $\pm$ 0.4 <sup>c</sup>  |
| 4     | Capture      | 60             | 12.5                        | 150              | Room        | His-tag HSA<br>(62.5 pmol)  | 1.0 $\pm$ 0.04 <sup>c</sup> |
| 5     | Capture      | 60             | 12.5                        | 150              | Room        | His-tag HSA<br>(62.5 pmol)  | 3.6 $\pm$ 0.3 <sup>c</sup>  |
| 6     | Capture      | 60             | 12.5                        | 150              | Room        | His-tag HSA<br>(62.5 pmol)  | 16.4 $\pm$ 3.2 <sup>c</sup> |
| 7     | Tissue       | 60             | Tissue section <sup>a</sup> | -                | Room        | None                        | 4.8 $\pm$ 0.5 <sup>d</sup>  |
| 8     | Tissue       | 50             | Tissue section <sup>a</sup> | -                | Room        | None                        | 8.8 $\pm$ 0.5 <sup>d</sup>  |
| 9     | Tissue       | 50             | Tissue section <sup>a</sup> | -                | Room        | None                        | 14.7 $\pm$ 0.8 <sup>d</sup> |

a: PD-L1 highly expressed cancer tissue section (NSCLC)

b: EDC/NHS activated carboxylic acid-magnetic beads

c: the ratio of the amount of eluted library to the amount of input PD-L1

d: the ratio of the amount of eluted library to the amount of input library

**Table S3.** Top 50 sequences identified by high-throughput sequencing of the final enriched library

| Rank | Sequences without primer binding sites (5'-3')                         | Quantity |
|------|------------------------------------------------------------------------|----------|
| 1    | GCACGGATCGAGCAATTCCA <u>ACGAGACGAGCTTATACGTAC</u> CCCCCTCTCGGTCCGCTGC  | 341      |
| 2    | CCCCAGGTTCTACAATCCA <u>ACGAGACGAGCTTATACGTAC</u> ACCACTCTCTCTGTGAGC    | 265      |
|      | T                                                                      |          |
| 3    | CGGCCAGGATTTCACTCTG <u>ACGAGACGAGCTTATACGTAC</u> CTTACTCATCCCTGGGCC    | 223      |
| 4    | GCACACTCCAGGACAATCTA <u>ACGAGACAAGCTTATGCATA</u> CAACCCTCAATTCGTGGGC   | 218      |
|      | C                                                                      |          |
| 5    | CCCCCAGACCTTATCCAGTT <u>ACGAGACGAGCTTATACATA</u> TGTCACCCTAGTATTGTGCGC | 197      |
| 6    | CCGACCAACAATTCTATT <u>ACGAGACGAGCTTATACGTATA</u> CTTTACATCGGCTGTGCGC   | 157      |
| 7    | GGCGGGGGCAAATAAGGGGA <u>ACGAGACGAGCTTATACGTAT</u> TACTAGGGTGGGGGTTG    | 155      |
|      | GC                                                                     |          |
| 8    | GCCCATCCCTTTGTGTTCA <u>ACGAGACAAGCTTATGCATA</u> CTTTTCACAGGTCTGTGCC    | 153      |
| 9    | CCCGACCCTATATTTGCTTA <u>ACGAGACGAGCTTATACGTAC</u> CTACCGATCCTCGGGCGCT  | 149      |
| 10   | CCCCACGGTTCATCCCTC <u>ACGAGACGA</u> ACTTATGCGTATTCAGTCTGGTTGGCCCTC     | 123      |
| 11   | GGCGCCTCTGATGTGTTCA <u>ACGAGACGAGCTTATACGTACT</u> ATTTCTGTGCCCCACCGC   | 120      |
| 12   | GCCGCAATGATCTTGTGAAA <u>ACGAACGAGCTTATGCATA</u> CATCCTACATCTCTGCTGCC   | 111      |
| 13   | GCAGGCAACGGTTCCTTAA <u>ACGAGACGA</u> ACTTATGCGTATACTGATCTTTCCGGGC      | 106      |
| 14   | CAGCACAGCAACCCATATCT <u>ACGAGACGAGCTTATACGTAT</u> TCCACCTCTGTTCTGCGCT  | 99       |
| 15   | CACGAGGGGCCAGCCTATTT <u>ACGAGACGAGCTTATACGTACT</u> TTCTATCGGCCACGTGC   | 96       |
| 16   | CACGGGATTCAGGTTTTT <u>ACGAGACGA</u> ACTTATGCATAATCAATGGGGTTCCTCCTGC    | 90       |
| 17   | CGCGGACTCTTCAATCAAC <u>ACGAGACGAGCTTATACGTAT</u> TTACCCACCCGAGCGCGT    | 89       |
| 18   | CCGCAACAGGCAACAGTTCA <u>ACGAGACGAGCTTATGCGTAG</u> CCCTTTGTCCCTCTTGCT   | 87       |
| 19   | GGCGGGCATCCTAAA <u>CTTACGAGACGAGCTTATACATA</u> CATGTCCTAGATGTACCCGC    | 86       |
| 20   | GCCGATTGGTTCAGCATCT <u>ACGAAACGAGCTTATGCGTAC</u> ATTTACTTCTGCTCCCGC    | 85       |
| 21   | CGCCAACTCCCTTTCATTG <u>ACGAGACGA</u> ACTTATGCGTAAACCCTCCTATGGTCTCTGC   | 84       |
| 22   | CGCGGGCAA <u>ACTTCTCTACGAGACGAGCTTATACGTACT</u> GCCCTCATGTGTGCTC       | 82       |
| 23   | CCGGCCAAACAGTATCTTCA <u>ACGAACGAGCTTATGCGTAC</u> CAATCTCCGCCAGTGTGT    | 82       |
| 24   | GGGGCCCTGGCTAACAA <u>TACGAGACGA</u> ACTTATGCATAAACCTACATTATCCTGCCG     | 81       |
|      | C                                                                      |          |
| 25   | CCCGCACAGTATGTAGCCAT <u>ACGAGACGAGCTTATACGTAT</u> ATTACTGCCCCCTGTGCG   | 81       |
| 26   | GCGGCACGGTCCATTCATA <u>ACGAGACGAGCTTATACGTACT</u> ACATTCTGCACCGTGCCG   | 80       |
| 27   | CCCCGAAGCTAATGCGATC <u>ACGAGACGA</u> ACTTATGCGTACTATCACTCACCTGCTCTGC   | 77       |
| 28   | CCGACGTGTGTTCTGTTCT <u>ACGAGACGAGCTTATACGTAC</u> CTTATCACTCGGCACCTG    | 77       |
| 29   | GCGCCCCCATGACAATGTT <u>ACGAGACAGCTTATGCATAT</u> TACCTCTAGCTCCGACCCG    | 74       |
| 30   | CCGCACATTTCTCCCTCTGG <u>ACGAGACGA</u> ACTTATGCGTATTCATGTATCCCTCCTGCCT  | 72       |
| 31   | CCGACCGAACCCAGTCTCTACA <u>AAGACGAGCCTTATGCGTAT</u> CGGGTGTGCTCCTCTCCG  | 71       |
|      | C                                                                      |          |
| 32   | CACCCACCCATTCATTCTTAC <u>ACGAGCTTATGCGTAA</u> CTGCACCGTCGGACTCTGC      | 71       |
| 33   | CGCAACCTCCCTGTTAAAA <u>ACGAGACGAGCTTATACGTAT</u> TAACTGCATGTCTGGCCT    | 68       |
| 34   | GCCCAACAGTTCCTCAAGTA <u>ACGAGACGAGCTTATACGTAC</u> CATGTTGCCAACTCCCTGT  | 68       |
| 35   | CCCGGGCCACAGTATTGCA <u>ACGAACGAGCTTATGCGTAC</u> ACGGTCTCCTTTCTGCCG     | 67       |

---

|    |                                                                        |    |
|----|------------------------------------------------------------------------|----|
| 36 | CCAGCACAATCTCCCGATT <u>ACGAGACAAGCTTATGCATA</u> CCAGGACATCTGCCGTGCGT   | 66 |
| 37 | CCCCCGCCCGACTTCCTCA <u>ACGAGACGTTATGCATAG</u> TAAGCCTCTTGGTACGCCC      | 64 |
| 38 | CGAACTGCCTCAATGAAGGACGAAACGAGCTTATGCATACTTACTCTAGTCTCTGTCC             | 64 |
| 39 | GCGGCGGAAGATAACCATTCT <u>ACGAGACGAACTTATGCATA</u> CCCCTACTAGTCATCTGCCG | 63 |
| 40 | CCCAGCCTGTGGTTCAGATA <u>ACGAGACAAGCTTATGCATA</u> CCTTTCGACTTCCTCATGTG  | 62 |
| 41 | GCCCCGCAACATTCTCTAG <u>ACGAAACGAGCTTATGCGT</u> ATTCTCCCCGCTCTGTGTGGC   | 62 |
| 42 | CCCAAGCAGGTTCTTTTAC <u>ACGAGCTTATGCATA</u> CAACGGTCTGGCCAACCTCG        | 60 |
| 43 | CCCCAACTTATACCGCTGC <u>ACGAGACGAACTTATGCGT</u> ATTTAGGTGTCTTGCCTCTGC   | 60 |
| 44 | CCGCGCATTCCCAGTATAGG <u>ACGAGACGAGCTTATACGT</u> ACCTTTTCCTGTCCATCGGCC  | 60 |
| 45 | GCACGGTGTACTGTTTTCTT <u>ACGAGACGAGCTTATACGT</u> ACCTTCTATCGATGCGCCGTG  | 60 |
| 46 | CCCACAGCATAGTATACCATA <u>ACGAGACGAGCTTATACGT</u> ACTTTTCATTGCTTGGGCCGT | 60 |
| 47 | GCCACGGTTCCTTCGCGTAC <u>ACGAAACGAGCTTATGCGT</u> ACATTGTCCAACCTCCCTGTGC | 59 |
| 48 | GCCCATTGACACAGAGGAGT <u>ACGAGACGAGCTTATAT</u> ATCCCTTACCATGCGTGC       | 59 |
| 49 | CAACCGGTTGCCAGACTTTT <u>ACGAGACGAACTTATGCGT</u> ACTCCCACTTCTTCCTGCC    | 57 |
| 50 | GGGGGCTCAAACATCACTCT <u>ACGAGACGAGCTTATACATA</u> CCATCCGCTGTTTTTGCCC   | 57 |

---

The underlined sequences are the middle constant regions.

**Table S4.** Sequences identified by cloning sequencing of the final enriched library

| Name    | Sequence without primer binding sites (5'-3')                          |
|---------|------------------------------------------------------------------------|
| Clon-1  | ACGACAGGAGGATTACAATC <u>ACGAGGCGAGCTTATGCGTATGATAATGTGCCATTGCT</u>     |
| Clon-2  | GACCCGACTGTAAGTGTGA <u>ACGAGACGAGCTTATACGTA</u> CTACTACATAACCCATTAC    |
| Clon-3  | CCCTCCTCCTAACTGTTCTC <u>ACGAAACGAGCTTATGCGTAA</u> TGATGACTGTCGTAGTTCG  |
| Clon-4  | CCAGCACTAGTCTTCACAT <u>ACGAGACGAGTTTATGCGTACGCTTCTCTGTTTTCTAGTG</u>    |
| Clon-5  | GCCCCACCCTCGCTAGTGTT <u>ACGAGACGAGCTTATGCGTAT</u> TGTAGCGGTTTTCCGTGCG  |
| Clon-6  | CGTGATCTGCGATAACCCTA <u>ACGAGACGAGCTTATGCGTAC</u> ATCTACTTGCCCCGCCTTAA |
| Clon-7  | CCCCCCTGTCCCAGCGTGG <u>ACGAGACGAGCTTATACGTA</u> CATTTTGACCGGGCGCATAAC  |
| Clon-8  | TCGTCCTGTGTAGTTCGA <u>ACGAGACGAGCTTATGCGTAG</u> ACTATGAGCCCTTTGGCCT    |
| Clon-9  | GCTCACGGGGTCTTGGCCT <u>ACGAGACGAGCTTATGCATA</u> TAGGGTTCACGCGATGGGGC   |
| Clon-10 | CACCTACCTCCTTGTGGTG <u>ACGAGACGAGCTTATGCGTAA</u> ATTCGCGAGAGTCTGTGCG   |
| Clon-11 | AACGACGCCCTGCTAGGTT <u>ACGAGACGAGCTTATGCGTAA</u> ACGTTTGACCACGGGTGCAA  |
| Clon-12 | TCTGGTCGATCTGCTGTATA <u>ACGAGACAAGCTTATGCGTACT</u> GGAATAGCCGTGCATGG   |
| Clon-13 | GCTCACGGGGTCTTGGCCT <u>ACGAGACGAGCTTATGCATA</u> TAGGGTTCACGCGATGGGGC   |
| Clon-14 | CTAGCAGTCCAAATTGAAAT <u>ACGAGACGAGCTTATGCGTACT</u> GACATATTCGGTTAGCGT  |
| Clon-15 | CCCGGGTCTACCCGAATTC <u>ACGAGACGAGCTTATGCGTAG</u> ACCACGGATTGGGAAATTG   |
| Clon-16 | CGTACAGCGCTAAAAATGCA <u>ACAGACGAGCTTATGCGTAG</u> CTTTCACGATCATCTTCGC   |
| Clon-17 | GCCCCACCTTAGACATTGGT <u>ACGAAACGAGCTTATGCGTAA</u> CCCTTCTCCGTGTGTGT    |
| Clon-18 | CCCGATCATAACTGTCGAG <u>ACGAGTTTATGCGTAA</u> CATATACGTGTCATTTGTC        |
| Clon-19 | CCCGTTTGACCCCGCGAGT <u>ACGAGACGAGCTTATGCGTAA</u> CCGCGGGGTGTGCCATCTG   |
| Clon-20 | GCCCCAACTGACCCTCGTATG <u>ACGAAACGAGCTTATGCGTAA</u> CTGTGGATCGTGTCTGATT |
| Clon-21 | GATTACTGCTTGCACTGCTT <u>ACGAGACGAGCTTATGTGTA</u> ACCTCCCATGTAGGTCTTTG  |
| Clon-22 | GCAGCTGGCCCGAAATATT <u>ACGAGACGAGCTTATGCGTAT</u> TTGCCCCAGCCTGGGTAT    |
| Clon-23 | CCGCACTCTGGAGGTTGT <u>ACGACGAGACGAGCTTATGC</u> AGCTGAGACTCGCGGCGATG    |

The underlined sequences are the middle constant regions.
